# Supplementary material for: Manganese oxide OMS-2 loaded on activated carbon fiber: a novel catalyst-assisted UV/PMS process for carbamazepine treatment in water
Source: Royal Society of Chemistry journal article supplement (doi:10.1039/d2nj02119f), 2022-01-01
Supplement: d2nj02119f1.pdf [file d2nj02119f1.pdf]

## Supporting Information

For

### **Manganese oxide OMS-2 loaded on activated carbon fiber: A novel catalyst assisted UV/PMS process for carbamazepine treatment in water**

Ning Yang <sup>a, 1</sup>, Lixi Xiao <sup>a, 1</sup>, Yuwei Deng <sup>a</sup>, Zhiyu Wu <sup>a</sup>, Hang Yin <sup>a</sup>, Yang Liu <sup>a</sup>, Mengru Li <sup>a</sup>, Yuxuan Ye <sup>a, b\*</sup>, Dandan Wang <sup>c</sup>, Qiang Li <sup>a, b</sup>, Fei Pan <sup>a, b\*</sup>, Dongsheng Xia <sup>a, b</sup>

a. School of Environmental Engineering, Wuhan Textile University, Wuhan 430073, China

b. Engineering Research Center for Clean Production of Textile Dyeing and Printing, Ministry of Education, Wuhan 430073, China

c. Analysis of Testing Center, Yancheng Institute of Technology, Yancheng 224051, China

\* Corresponding author:

E-mail address: [yxye@wtu.edu.cn](mailto:yxye@wtu.edu.cn) (Y. Ye), [fpan@wtu.edu.cn](mailto:fpan@wtu.edu.cn) (F. Pan)

This supplementary file contains 3 figures, and 1 table, i.e., **Table S1 and Figures S1-**

S3.

**Table S1** BET analysis of fresh OMS-2@ACF, OMS-2, ACF and used OMS-2@ACF

| <b>Sample</b>          | <b>BET<br/>(m<sup>2</sup> g<sup>-1</sup>)</b> | <b>Micropore<br/>volume (cm<sup>3</sup> g<sup>-1</sup>)</b> | <b>Total pore<br/>volume<br/>(cm<sup>3</sup> g<sup>-1</sup>)</b> | <b>Average pore<br/>diameter<br/>(nm)</b> |
|------------------------|-----------------------------------------------|-------------------------------------------------------------|------------------------------------------------------------------|-------------------------------------------|
| <b>fresh OMS-2@ACF</b> | 712.09                                        | 0.22                                                        | 0.36                                                             | 1.99                                      |
| <b>OMS-2</b>           | 140.85                                        | 0.003                                                       | 0.07                                                             | 1.98                                      |
| <b>ACF</b>             | 949.28                                        | 0.323                                                       | 0.48                                                             | 2.03                                      |
| <b>used OMS-2@ACF</b>  | 642.80                                        | 0.16                                                        | 0.37                                                             | 2.32                                      |

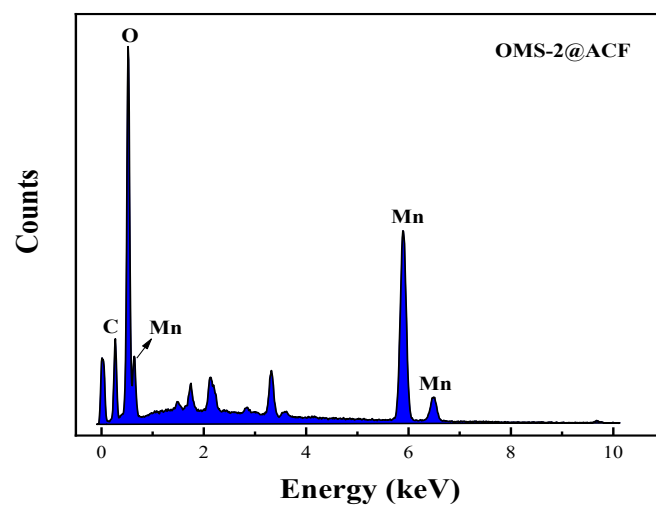

**Fig. S1** EDS analysis of OMS-2@ACF

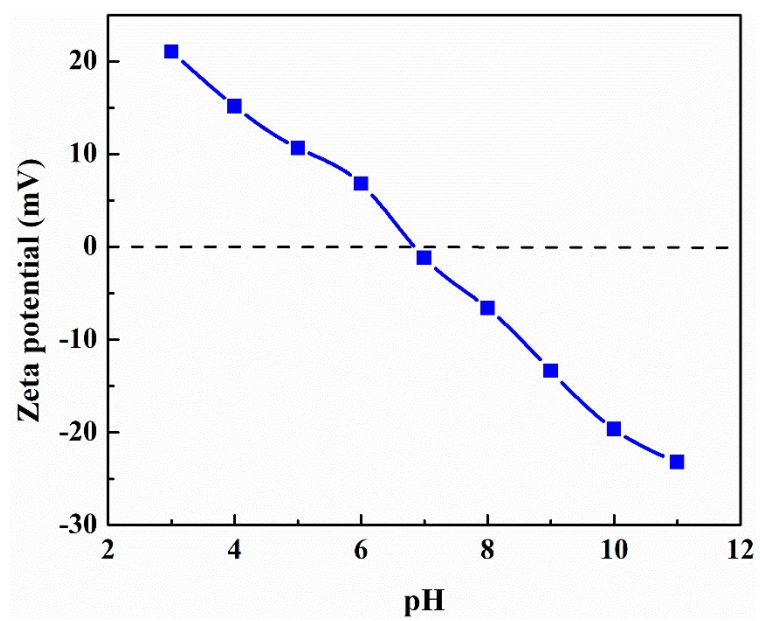

Fig. S2 Zeta potential of OMS-2@ACF at various pHs

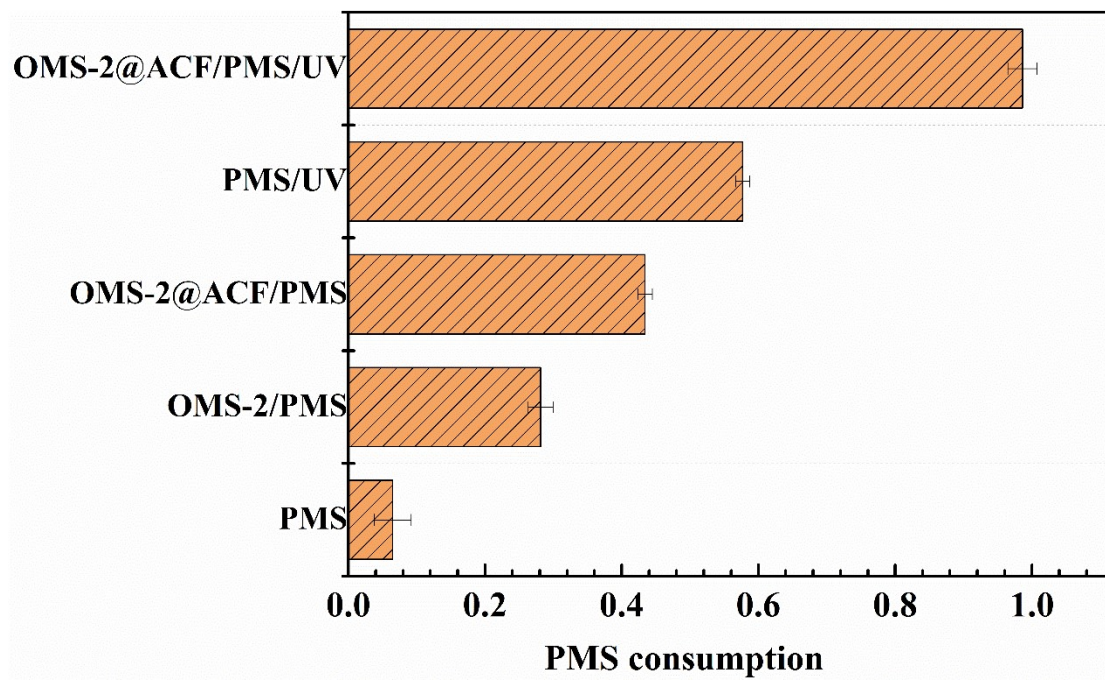

Fig. S3 PMS consumption in different systems
